# Supplementary material for: Tracking the DNA complexation state of pBAE polyplexes in cells with super resolution microscopy
Source: Royal Society of Chemistry journal article supplement (doi:10.1039/c9nr02858g), 2019-01-01
Supplement: c9nr02858g1.pdf [file c9nr02858g1.pdf]

## Supporting Information

Tracking complexation state of PBAE polyplexes in cells with super resolution microscopy

Roger Riera<sup>1,2</sup>, Natalia Feiner-Gracia<sup>1</sup>, Cristina Fornaguera<sup>2</sup>, Anna Cascante<sup>2,3</sup>, Salvador Borrós<sup>2,3</sup>, Lorenzo Albertazzi<sup>1,4</sup>

<sup>1</sup>Nanoscopy for nanomedicine, Institute for Bioengineering of Catalonia, Barcelona, Spain

<sup>2</sup>Grup d'Enginyeria de Materials (GEMAT), Institut Químic de Sarrià, Universitat Ramon Llull, Barcelona, Spain

<sup>3</sup>Sagetis-Biotech, Barcelona, Catalonia, 08017, Spain

<sup>4</sup>Department of Biomedical Engineering, Institute for Complex Molecular Systems (ICMS), Eindhoven University of Technology, Eindhoven, Netherlands

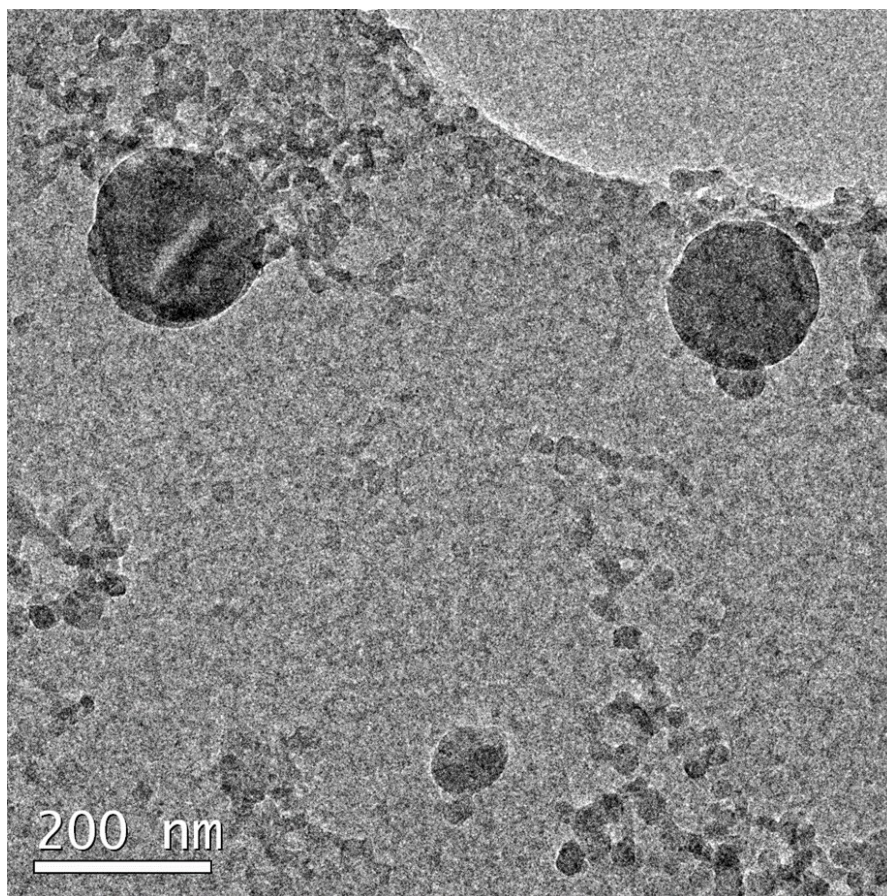

**Fig. S1** CryoTEM image of pBAE polyplexes. Two polyplexes are shown, accompanied by other smaller structures that are attributed to be aggregates of polymer.

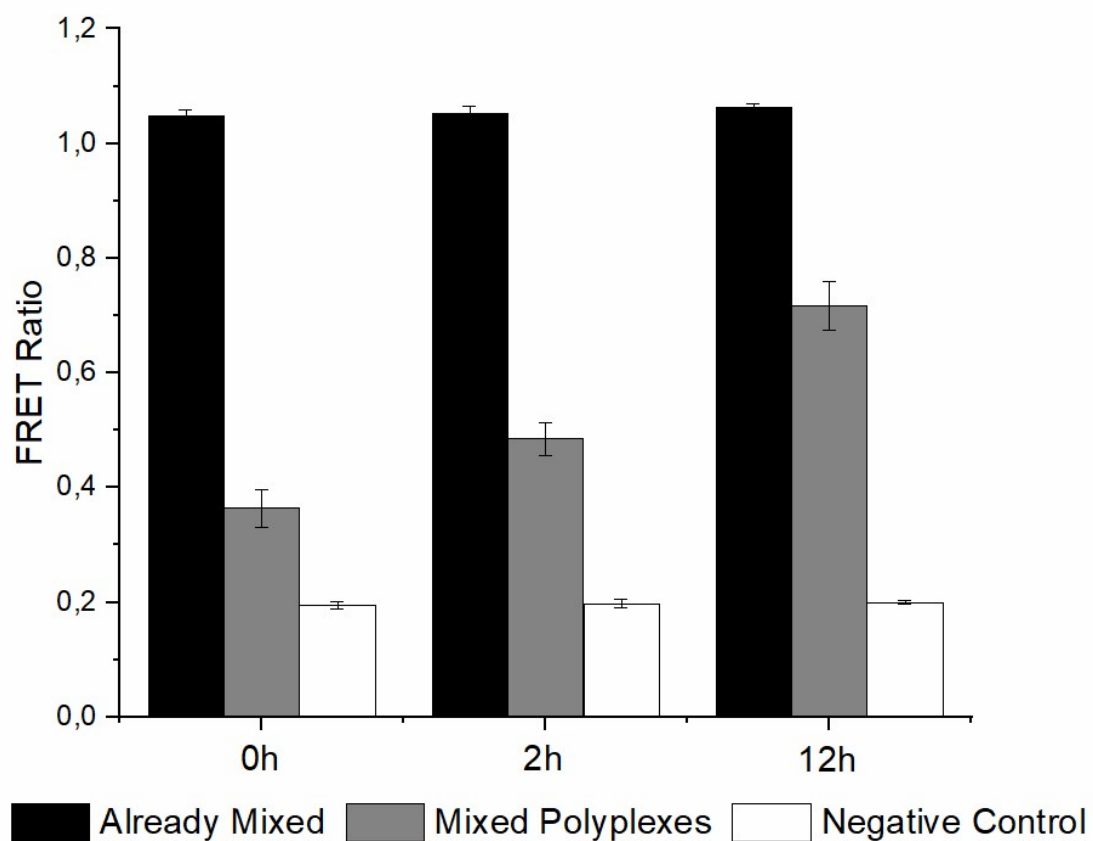

**Fig. S2** Dynamic equilibrium established between polyplexes and free polymer molecules. FRET signal increases when a Cy3-labelled and a Cy5-labelled batch of polyplexes are mixed. Signal remains stable when polyplexes are already prepared with Cy3-labelled pDNA and Cy5-labelled PBAE.

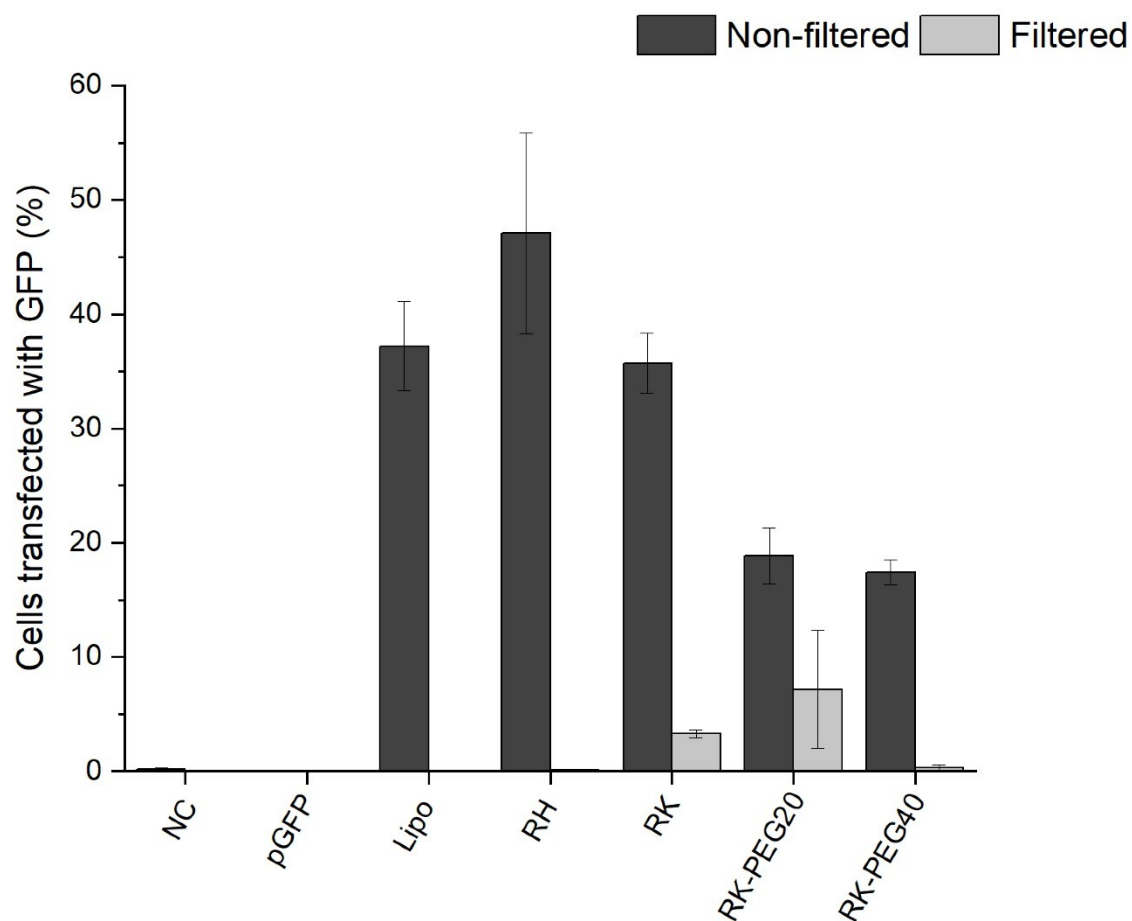

**Fig. S3** Transfection efficiencies of different kinds of lyophilized pBAE polyplexes in ARPE cultured cells before and after filtration (R: arginine, H: histidine, K: lysine). Mean and standard deviation are plotted. Negative control with only C<sub>6</sub> polymer (NC) or only pGFP are plotted in the first two columns. The same plasmid is transfected with Lipofectamine as a positive control of transfection. Those controls are only tested non-filtered.

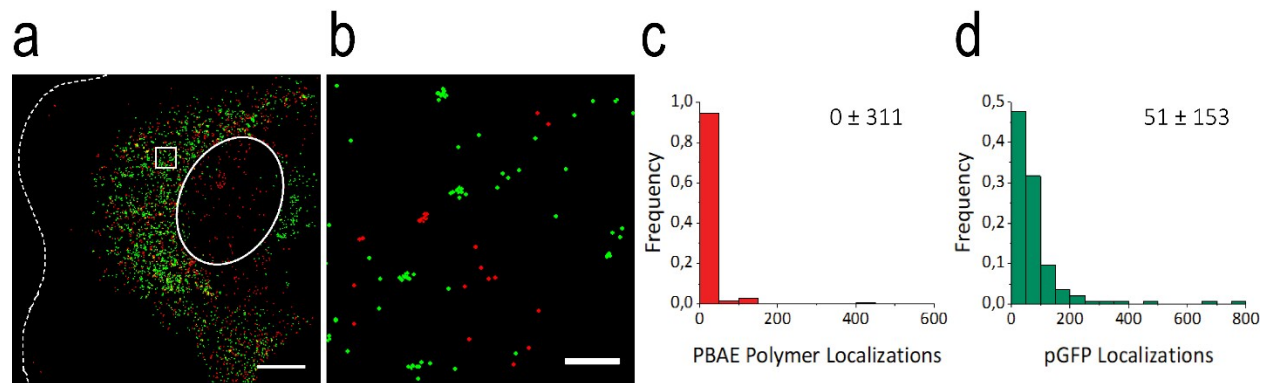

**Fig. S4** *d*STORM images quantification at 48h. (a) Representative *d*STORM image of pBAE polyplexes (pBAE in red and pDNA in green) in COS7 cells after 48h incubation. Dashed line delimits the cell membrane and circle the nucleus. (b) Close-up view on white square in a. (c) Quantification of pBAE polymer localizations in each polyplex (median  $\pm$  SD). (d) Quantification of pDNA localizations in each polyplex (median  $\pm$  SD). Scale bars, 10  $\mu$ m (a), 500 nm (b).

Table S1 | PBAE polyplex DLS measurements. Data is shown in mean  $\pm$  SD.

| Sample                       | Size (nm)        | PDI               |
|------------------------------|------------------|-------------------|
| <i>Fresh</i>                 | 146.1 $\pm$ 7.6  | 0.147 $\pm$ 0.025 |
| <i>Lyophilized</i>           | 169.2 $\pm$ 17.3 | 0.166 $\pm$ 0.004 |
| <i>Before Filtering</i>      | 168.8 $\pm$ 21.4 | 0.338 $\pm$ 0.056 |
| <i>Non-filtered fraction</i> | 194.6 $\pm$ 32.5 | 0.368 $\pm$ 0.145 |
